# Supplementary material for: Engineered biomimetic nanovesicles show intrinsic anti-inflammatory properties for the treatment of inflammatory bowel diseases
Source: Royal Society of Chemistry journal article supplement (doi:10.1039/c7nr04734g), 2017-01-01
Supplement: c7nr04734g1.pdf [file c7nr04734g1.pdf]

## Supporting Information

### **Engineered biomimetic nanovesicles show intrinsic anti-inflammatory properties for the treatment of inflammatory bowel diseases**

*Claudia Corbo,<sup>1#\*†</sup> Walter E. Cromer,<sup>2#</sup> R. Molinaro,<sup>1#</sup> Naama E. Toledano Furman<sup>1</sup>, Kelly A. Hartman,<sup>1</sup> Enrica De Rosa,<sup>3</sup> Christian Boada,<sup>1,4</sup> Xin Wang,<sup>1</sup> David C. Zawieja<sup>2</sup>, Marco Agostini,<sup>5,6</sup> Francesco Salvatore,<sup>7</sup> Bincy P. Abraham,<sup>8</sup> Ennio Tasciotti<sup>1,9\*</sup>*

<sup>1</sup>Center for Biomimetic Medicine, Houston Methodist Research Institute, 6670 Bertner Avenue, Houston, Texas 77002, United States; <sup>2</sup> Department of Medical Physiology, Division of Lymphatic Biology, Texas A&M University Health Science Center, Temple, Texas 76504, United States; <sup>3</sup>Department of Nanomedicine, Houston Methodist Research Institute, Houston, TX, USA; <sup>4</sup> Escuela de Ingeniería y Ciencias, Tecnológico de Monterrey, Monterrey, Nuevo León, Mexico; <sup>5</sup>Clinica Chirurgica I, Dipartimento di Scienze Chirurgiche Oncologiche e Gastroenterologiche, Università di Padova, Via Giustiniani 2, Padova, 35128, Italy; <sup>6</sup> Nano-Inspired Biomedicine Lab., Institute of Paediatric Research - Città Della Speranza, Corso Stati Uniti 4, 35127, Padova, Italy; <sup>7</sup>CEINGE–Biotechnologie Avanzate s.c.a r.l., Via G. Salvatore 486, Naples, 80145, Italy; <sup>8</sup>Division of Gastroenterology and Hepatology, Houston Methodist Hospital, 6565 Fannin St, Houston, Texas 77030, United States; <sup>9</sup>Department of Orthopedics, Houston Methodist Hospital, 6565 Fannin St, Houston, Texas 77030, United States. #These authors contributed equally to this work. \*To whom correspondence should be addressed: Claudia Corbo, PhD; Center for Biomimetic Medicine, Houston Methodist Research Institute; 6670 Bertner Ave, Houston, TX 77030 Tel: +1 832-266-7235; [ccorbo@bwh.harvard.edu](mailto:ccorbo@bwh.harvard.edu) and Ennio Tasciotti, Ph.D.; Center for Biomimetic Medicine, Houston Methodist Research Institute; 6670 Bertner Ave, Houston, TX, 77030; Tel: +1 713-441-7319; [etasciotti@houstonmethodist.org](mailto:etasciotti@houstonmethodist.org). †The present address of Claudia Corbo is the Center for Nanomedicine, Brigham and Women's Hospital, Harvard Medical School, Boston, MA.

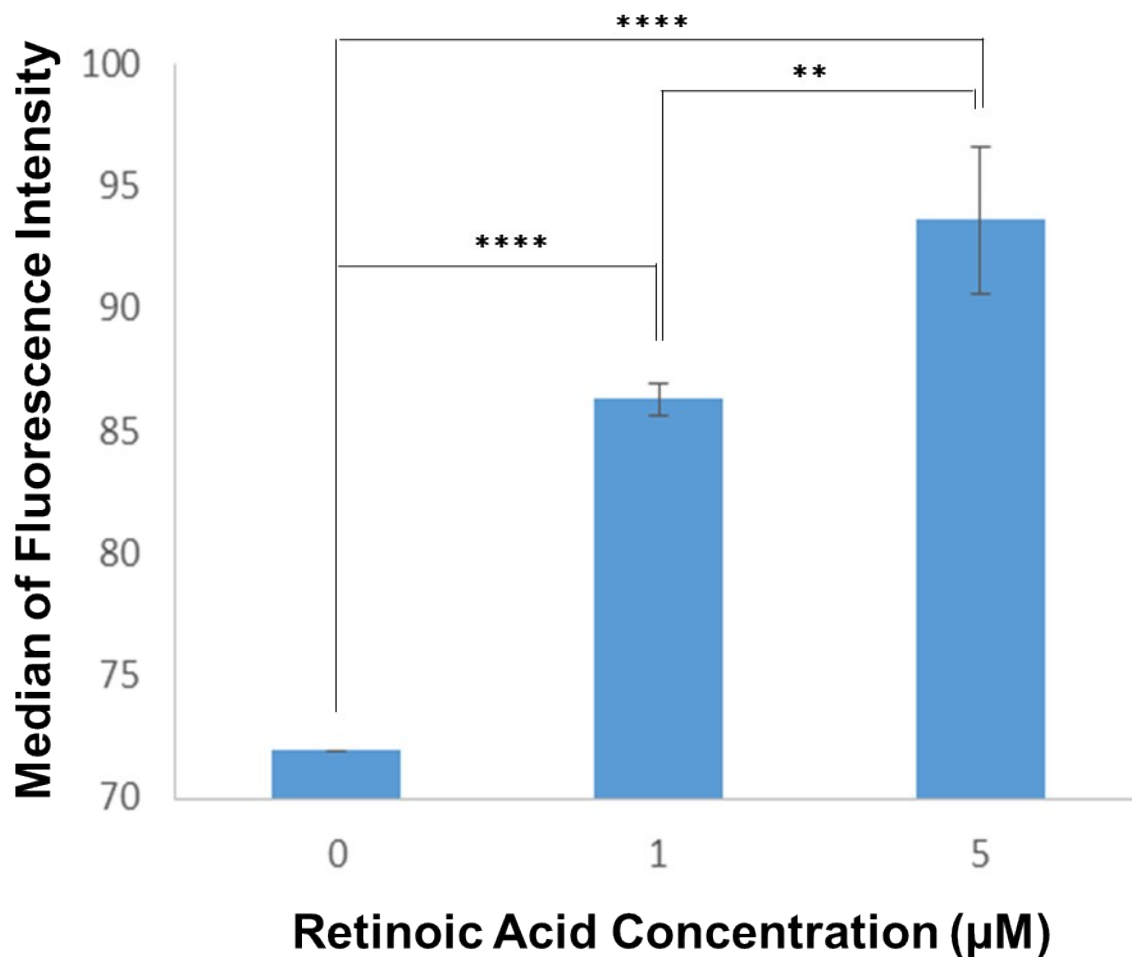

**Figure S1. Choice of retinoic acid concentration to induce  $\alpha 4\beta 7$  overexpression.** To enhance the GI-targeting abilities of the SLKs, primary immune cells were stimulated with retinoic acid prior to membrane proteins extraction and preparation of nanoparticles. Flow analysis was used to determine the levels of  $\alpha 4\beta 7$  integrin presentation by stimulation of cells with different concentration of retinoic acid. When cells are stimulated with retinoic acid, they show higher levels of the integrin both for 1 and 5  $\mu\text{M}$  compared to non-stimulated cells (0  $\mu\text{M}$ ). The results are presented as MFI (Median of Fluorescence Intensity)  $\pm$  standard deviation. \*\*\*\*  $p < 0.0001$ ; \*\* $p < 0.01$ .

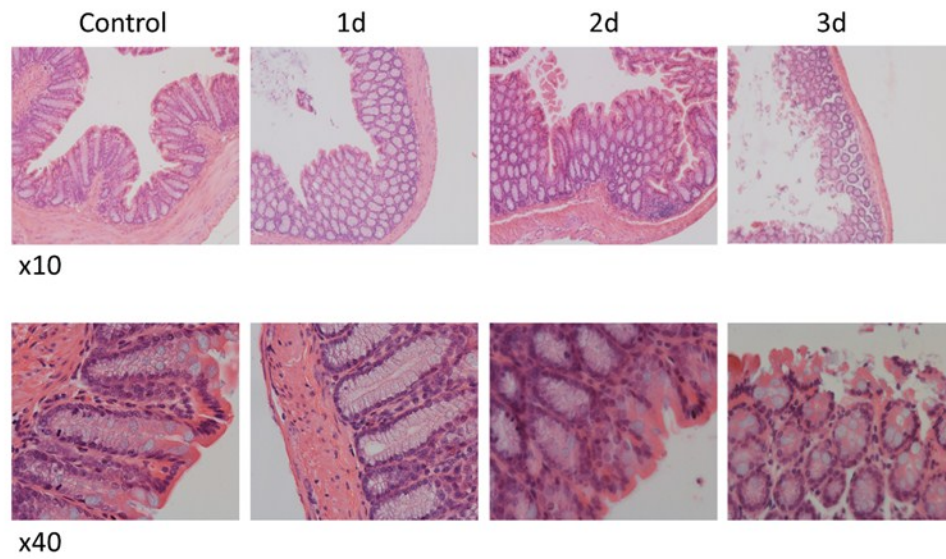

**Figure S2. Histopathological evaluation of colons after DSS treatment.** Histopathological analysis of colons from DSS-treated mice (4% w/v) harvested at day 1, 2, and 3 after DSS hydration.

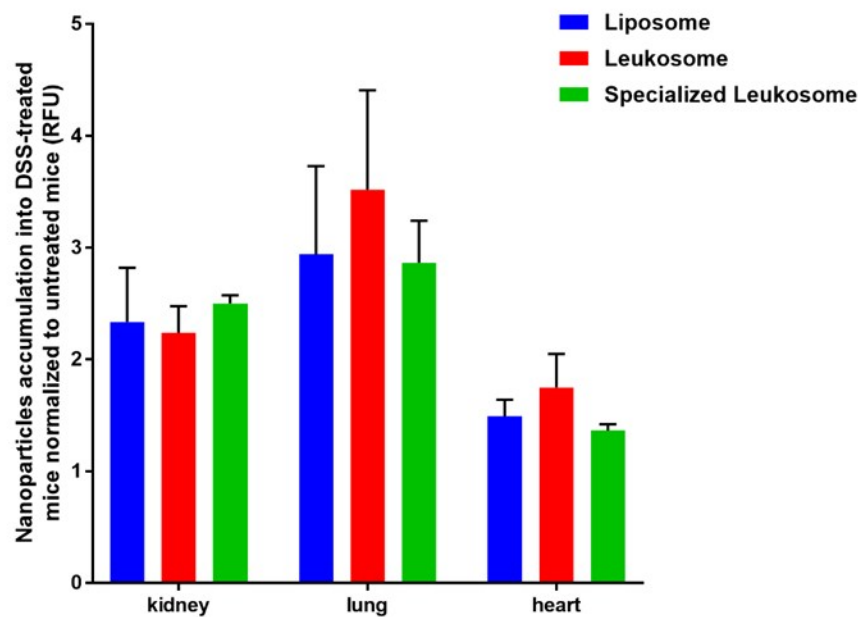

**Figure S3. Evaluation of nanoparticles biodistribution in DSS-treated mice.** Nanoparticles' biodistribution in kidney, lung, and heart is illustrated. Nanoparticles fluorescence was investigated into the organs of interest in DSS-treated mice. Results are reported as RFU normalized to healthy mice.
